# Supplementary material
Source: publisher site journal article supplement (https://static.cambridge.org/content/id/urn:cambridge.org:id:article:S1368980020001251/resource/name/S1368980020001251supp001.docx)

**Supplemental figures**

Figure S1. Average intake reported by week of data collection, components of total dairy over two-year data collection period (2017-2019).

Milk


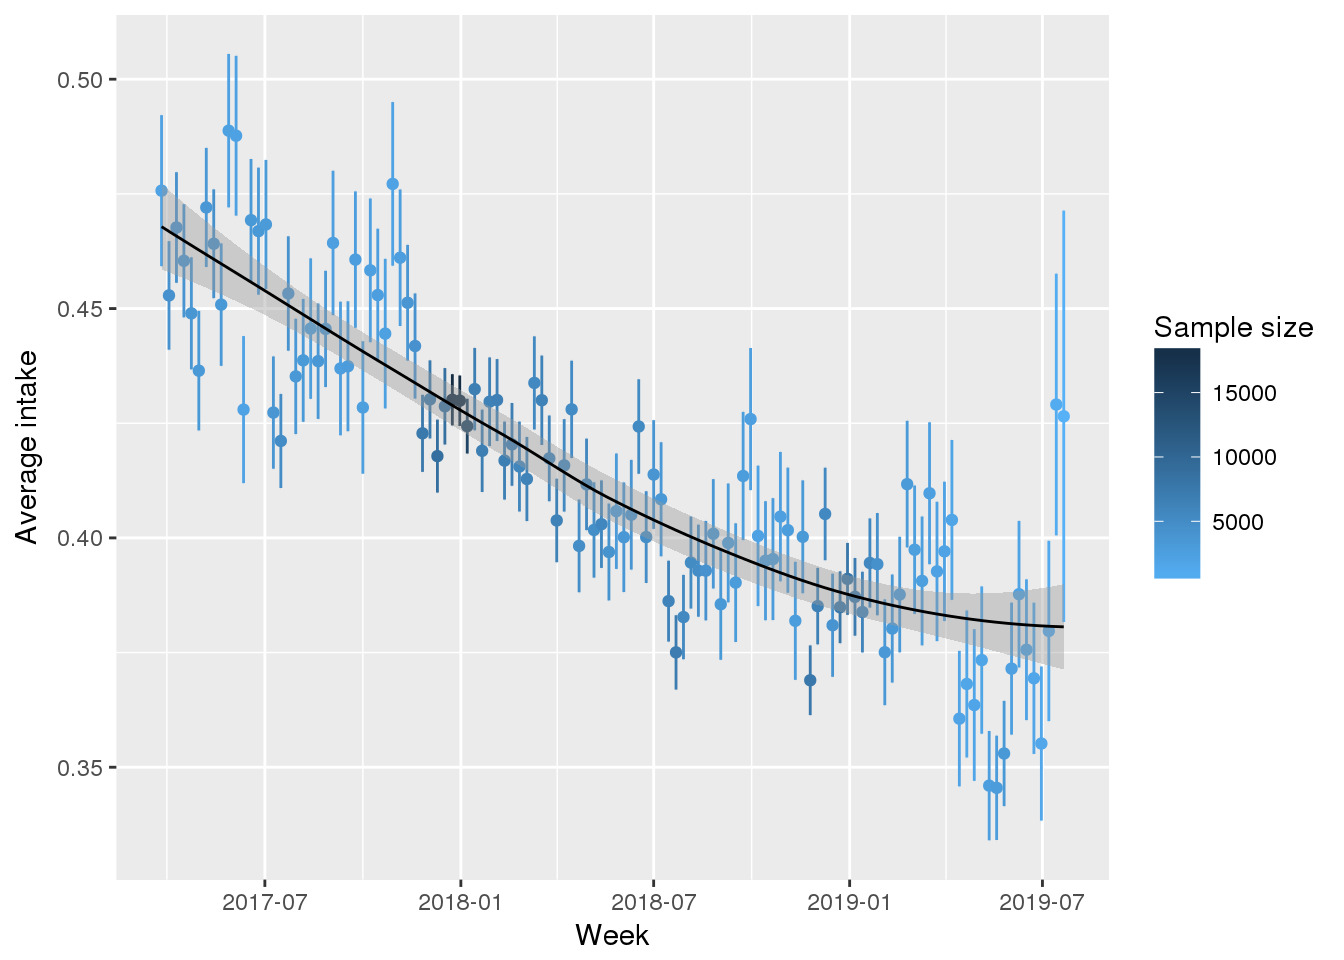


Cheese


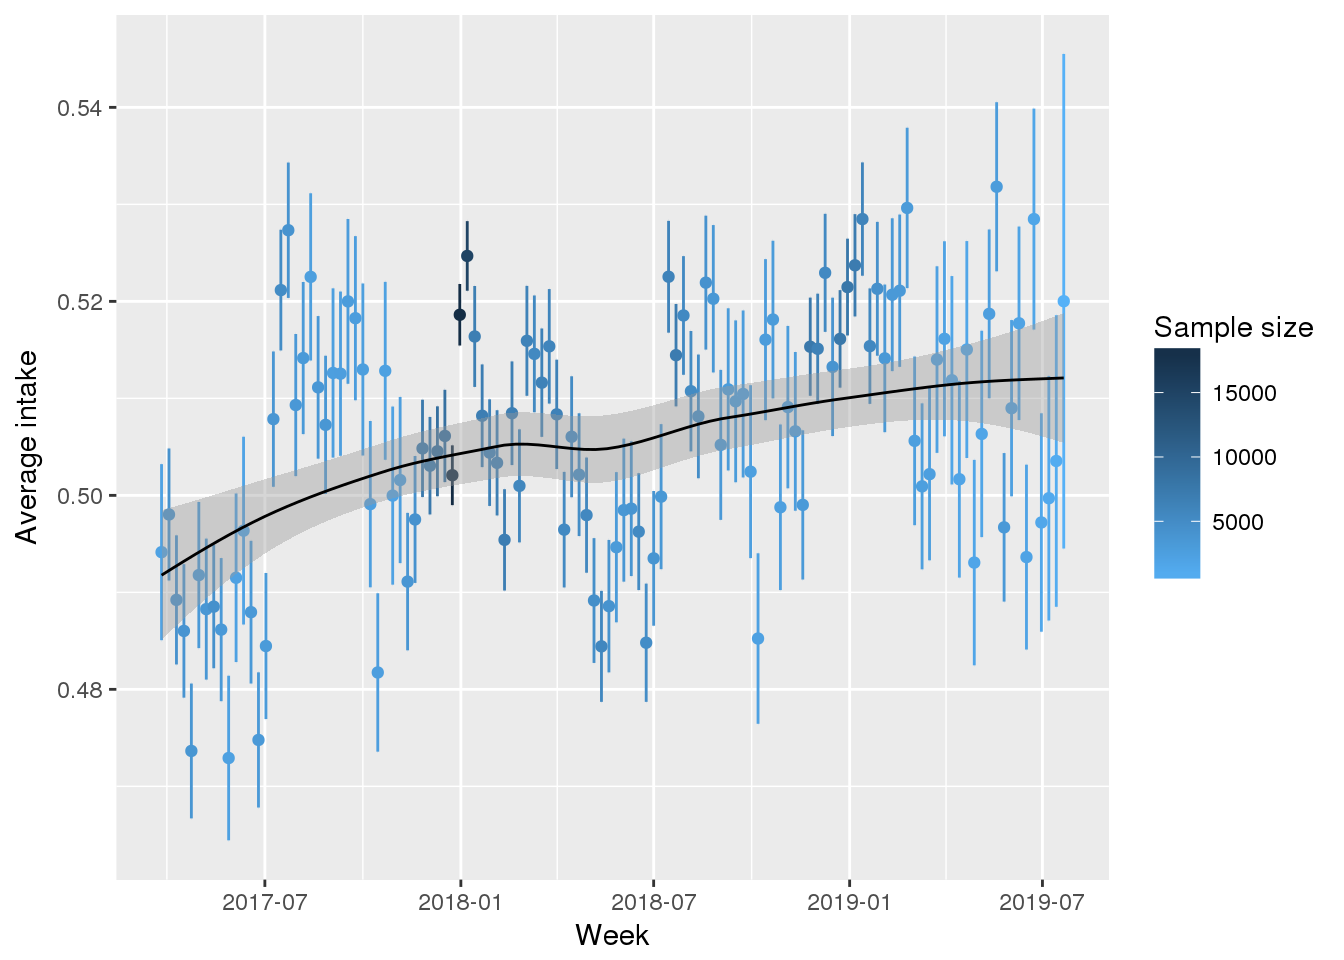


Pizza


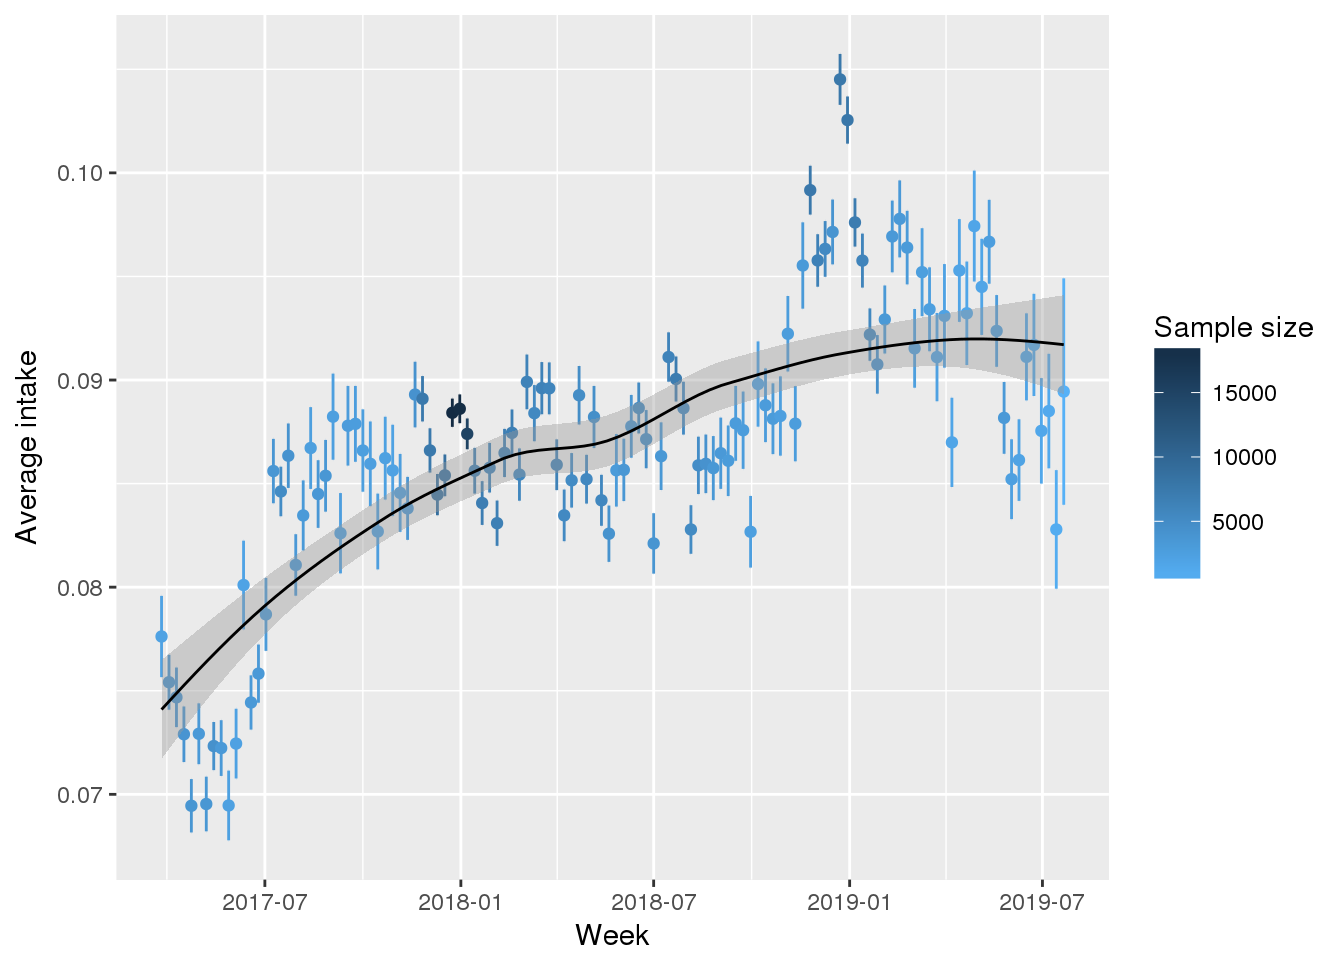


Ice cream


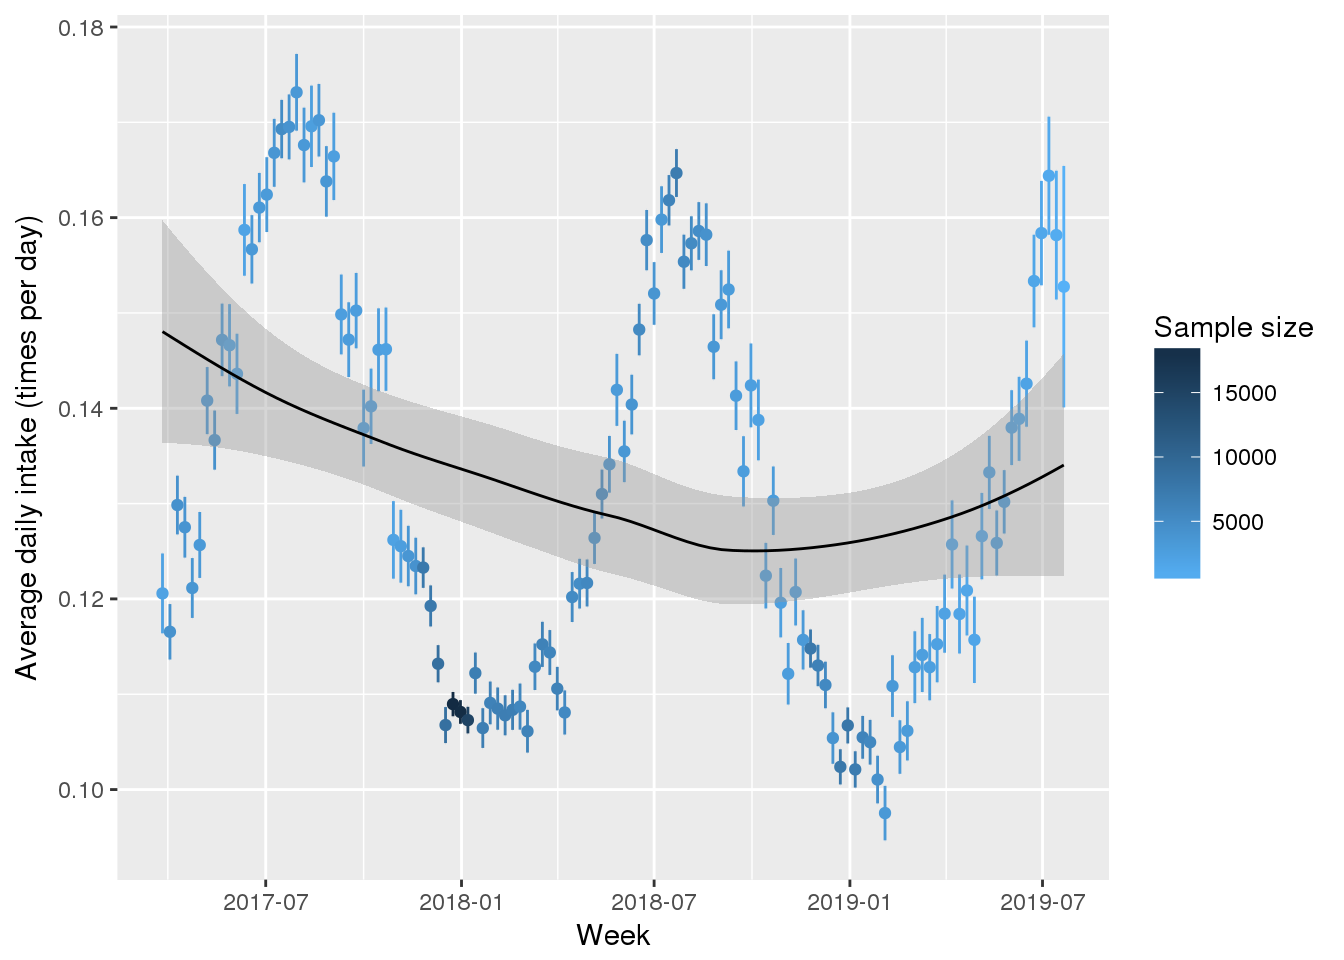

Supplement: Supplementary file 1 [file S1368980020001251supp001.docx]
